# Supplementary material
Source: PubMed Central journal article supplement (PMC7611175)
Supplement: EMS128771-supplement-Supplementary_information.pdf [file EMS128771-supplement-Supplementary_information.pdf]

# Online Supplement

## **Tumor cell-derived Angiopoietin-2 promotes metastasis in melanoma**

Ashik Ahmed Abdul Pari, Mahak Singhal, Corinne Hübers, Carolin Mogler, Benjamin Schieb, Anja Gampp, Nicolas Gengenbacher, Louise E Reynolds, Dorothee Terhardt, Cyrill Géraud, Jochen Utikal, Markus Thomas, Sergij Goerdts, Kairbaan Hodivala-Dilke, Hellmut G. Augustin, Moritz Felcht

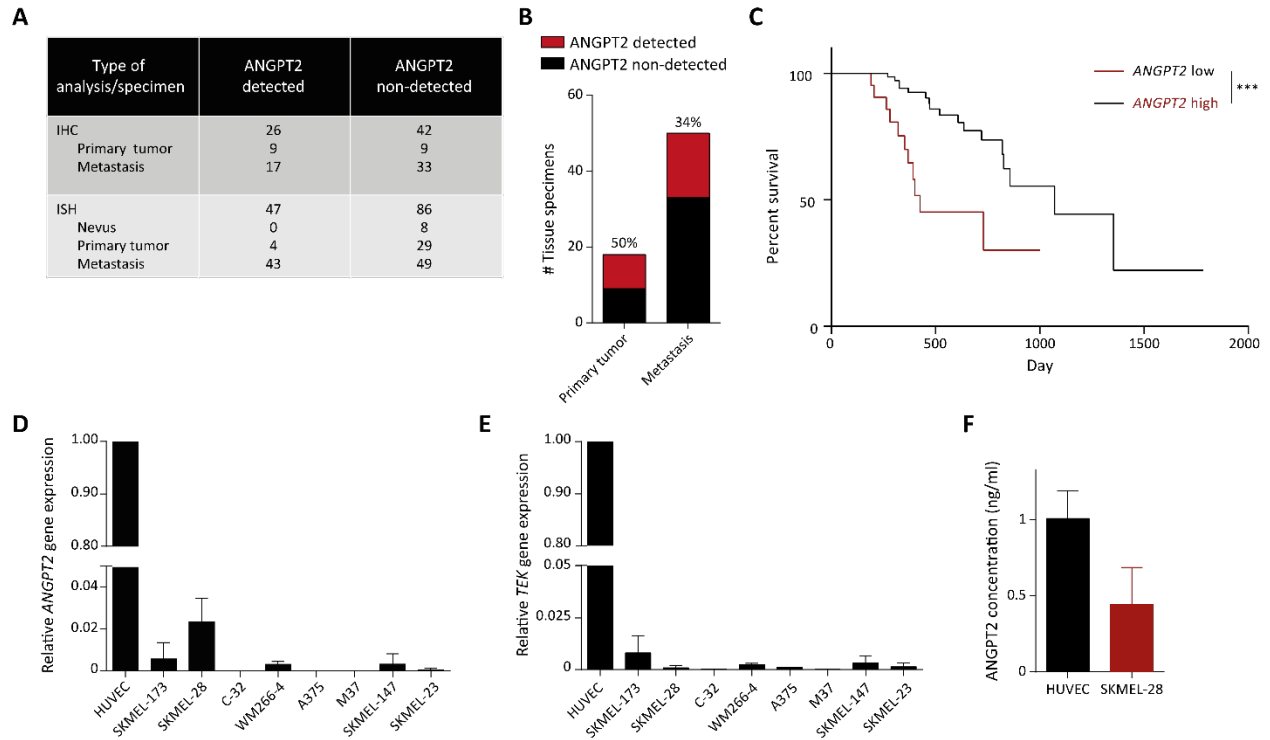

**Supplementary figure S1. Melanoma cells express ANGPT2.** (A) Table depicting the number of clinical specimens tested positive/negative for ANGPT2 expression from the analyzed tissue microarrays. (B) Quantitation of patients expressing ANGPT2 in primary (n=18) and metastatic tumor sections (n=50) determined by IHC. (C) Kaplan-Meier graph comparing percent survival between patients expressing either high (n=79) or low *ANGPT2* (n=23). \*\*\*,  $P < 0.001$ . Log-rank (Mantel-Cox) test. (D) *ANGPT2* expression in different human melanoma cells quantified using qRT-PCR. The data are normalized to *ANGPT2* expression in HUVEC (n=3-4; mean  $\pm$  SD). (E) *TEK* expression in different human melanoma cells quantified using qRT-PCR. The data are normalized to *TEK* expression in HUVEC (n=2-3; mean  $\pm$  SD). (F) ELISA to quantify ANGPT2 in culture supernatants of HUVEC and SKMEL-28 cells (n=3; mean  $\pm$  SD).

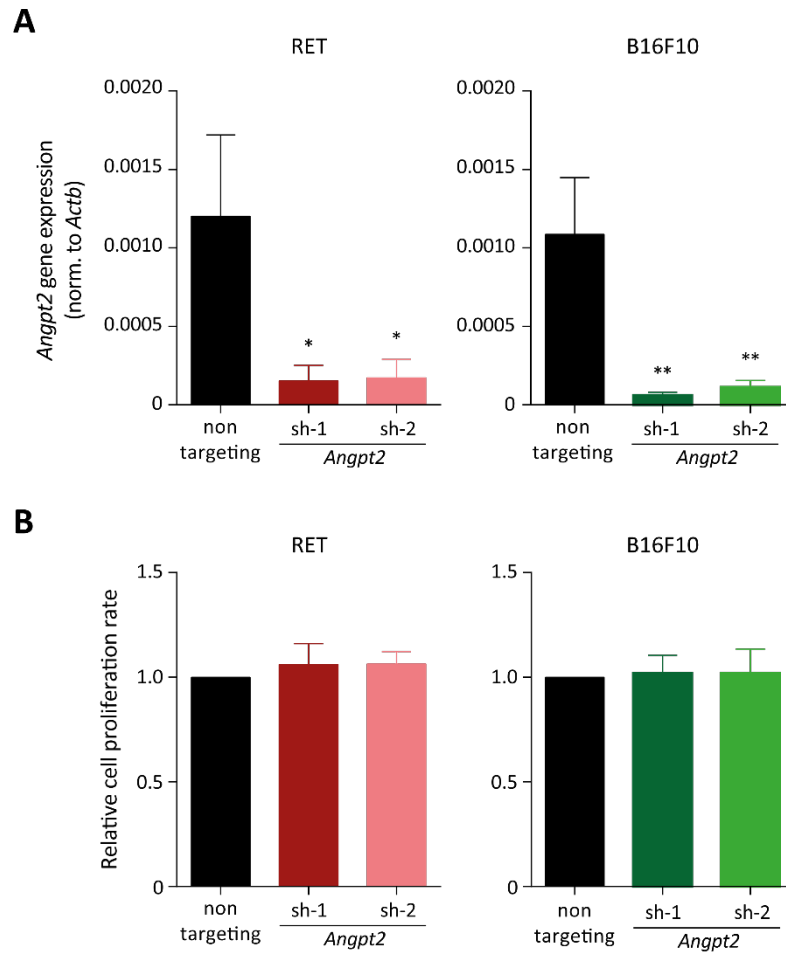

**Supplementary figure S2. Melanoma cell-expressed *Angpt2* does not modulate tumor cell proliferation.**

**(A)** Lentivirus-mediated knockdown of *Angpt2* in RET and B16F10 cells using two independent shRNAs (sh-1 and sh-2) (n=3; mean  $\pm$  SD). \*, p<0.05, \*\*, p<0.01, two-tailed unpaired Student's t-test. **(B)** MTT-based cellular proliferation assay performed with control and *Angpt2* knockdown cells (n=3; mean  $\pm$  SD).

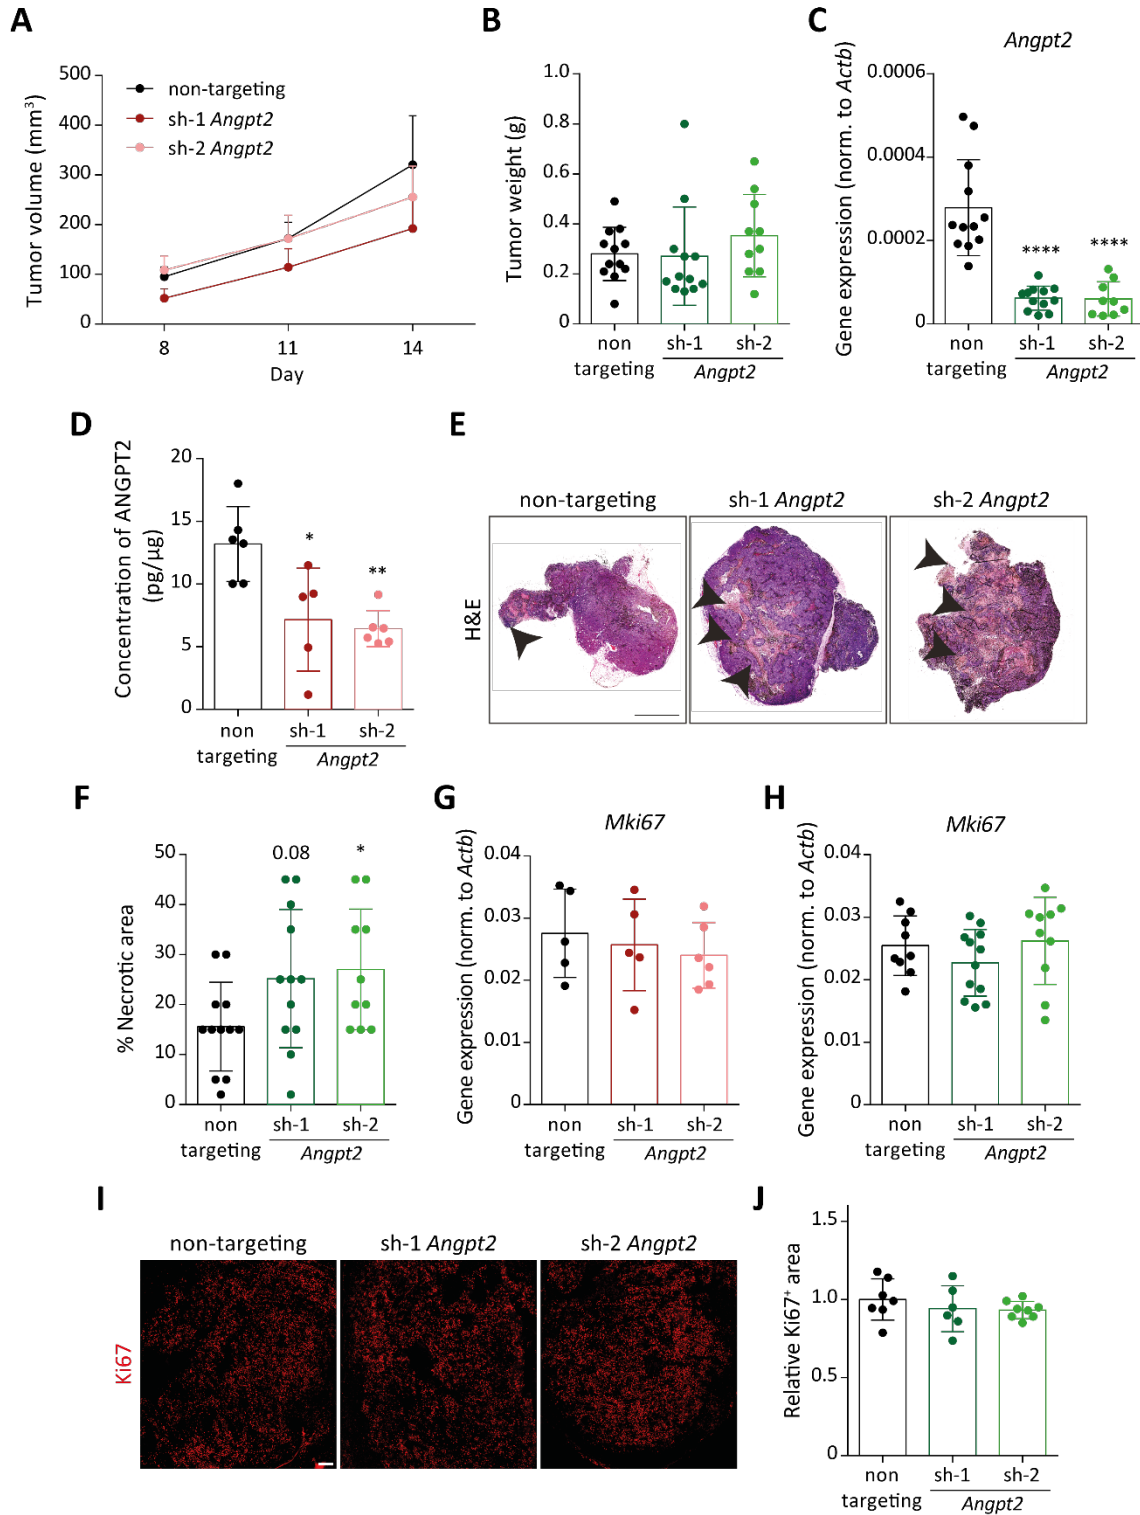

**Supplementary figure S3. Tumor cell knockdown of *Angpt2* does not impact growth of primary tumors.**

**(A)** Growth kinetics of control (non-targeting) and *Angpt2*-knockdown (sh-1 and sh-2) RET tumors (n=6; mean  $\pm$  SEM). The comparison was rendered non-significant by 2-way ANOVA with Bonferroni's multiple comparison test. **(B)** Tumor weight at day 14 after inoculation of control and *Angpt2*-deficient B16F10 cells (n=10-12; mean  $\pm$  SD). **(C)** *Angpt2* expression in control and *Angpt2* knockdown B16F10 primary tumors quantified by qRT-PCR (n=9-12; mean  $\pm$  SD). \*\*\*\*,  $p < 0.0001$ , Mann Whitney U test. **(D)** ELISA-based measurements of ANGPT2 concentration in either non-targeting control or knockdown RET primary tumors (n=5-6; mean  $\pm$  SD). \*,  $p < 0.05$ ; \*\*,  $p < 0.01$ , Mann Whitney U test. **(E)** Representative H&E images of control and *Angpt2* knockdown B16F10 primary tumors are shown. Arrowheads indicate necrotic area. Scale bar: 2mm. **(F)** Quantitation of intratumoral necrotic area (n=10-12; mean  $\pm$  SD). \*,  $p < 0.05$ , Mann Whitney U test. **(G)** *Mki67* expression in control and *Angpt2* knockdown RET primary tumors as quantified using qRT-PCR (n=5-6; mean  $\pm$  SD). **(H)** *Mki67* expression in control and *Angpt2* knockdown B16F10 primary tumors as quantified using qRT-PCR (n=9-12; mean  $\pm$  SD). **(I)** Representative images of tissue sections from control and *Angpt2* knockdown B16F10 primary tumors stained with KI67 (in red). Scale bar: 200 $\mu$ m. **(J)** Quantitation of KI67-positive area normalized to DAPI area in control and *Angpt2* knockdown B16F10 primary tumors (n=6-8; mean  $\pm$  SD).

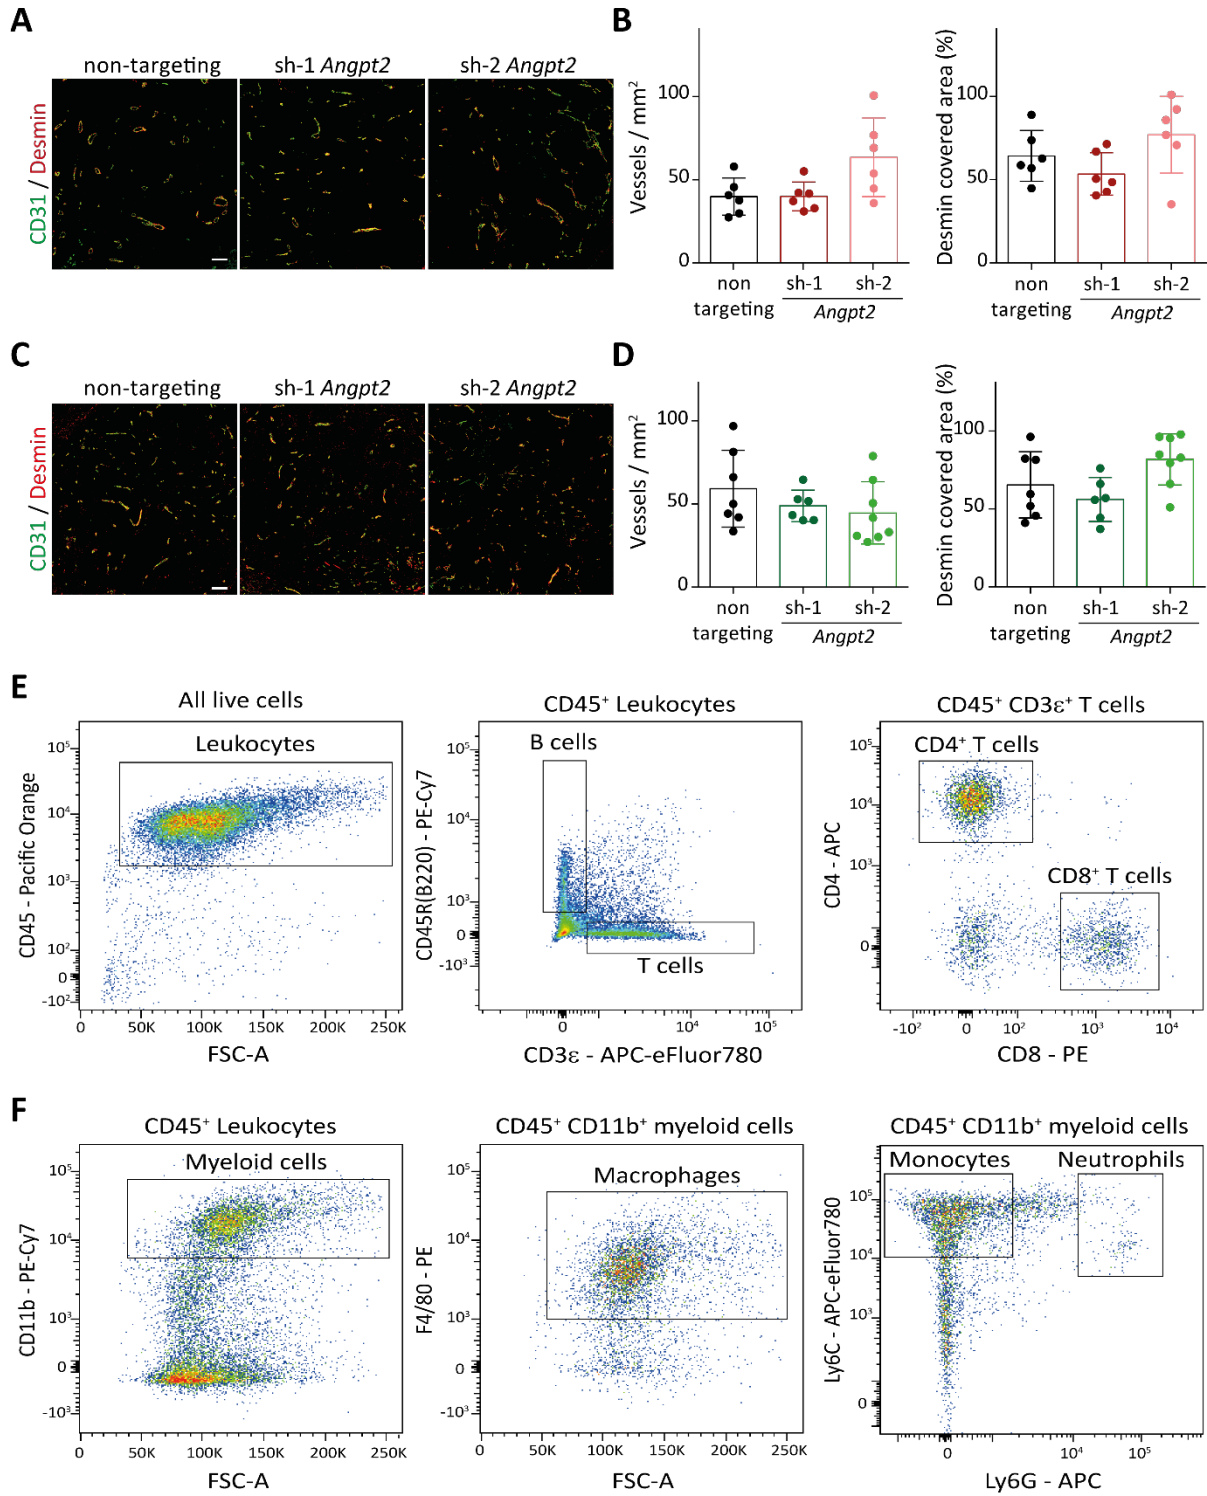

**Supplementary figure S4. *Angpt2*-depletion in melanoma cells does not affect primary tumor microenvironment. (A)** Representative images of RET tumor sections co-stained with CD31 (in green) and Desmin (in red). Scale bar: 200 $\mu$ m. **(B)** Quantitation of vessel density and Desmin coverage in control and *Angpt2* knockdown RET primary tumors (n=6; mean  $\pm$  SD). **(C)** Representative images of B16F10 tumor sections co-stained with CD31 (in green) and Desmin (in red). Scale bar: 200 $\mu$ m. **(D)** Quantitation of vessel density and Desmin coverage in control and *Angpt2* knockdown B16F10 primary tumors (n=6-8; mean  $\pm$  SD). **(E-F)** Representative FACS plots depicting FACS gating strategy for analysis of tumor-infiltrating lymphoid **(E)** and myeloid **(F)** cells.

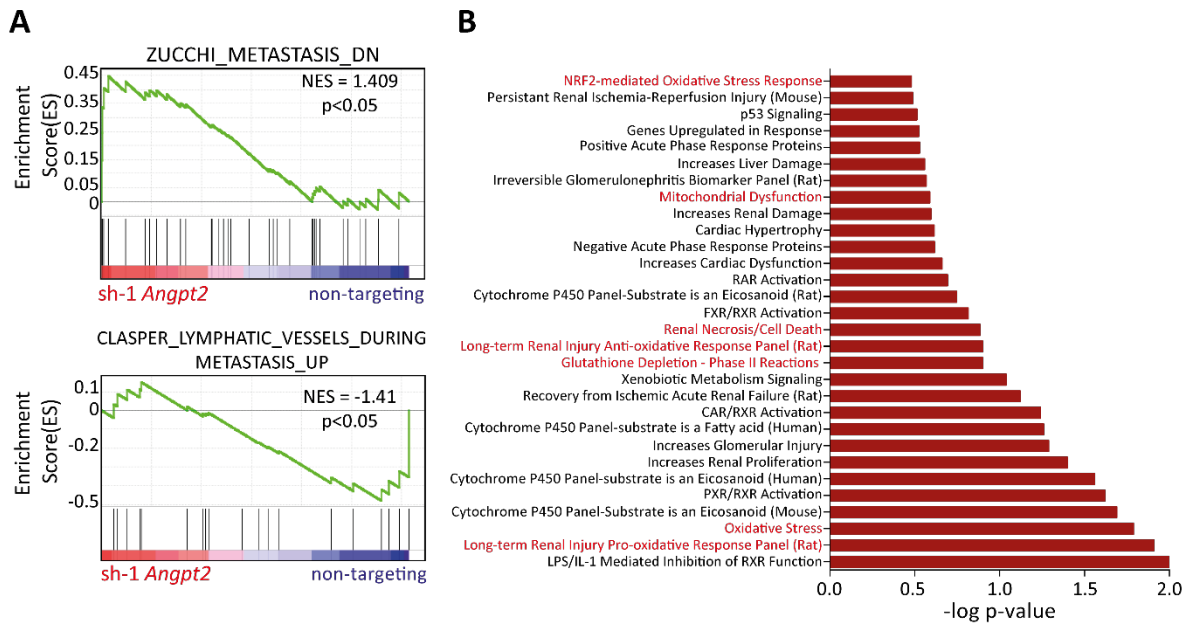

**Supplementary figure S5. *Angpt2*-depletion alters pathways governing metastasis and oxidative stress. (A)** GSEA plots showing regulated metastasis-related pathways in *Angpt2*-depleted tumor cells. **(B)** IPA analysis for toxicological functions with the identified differentially-expressed genes in *Angpt2*-depleted cells.



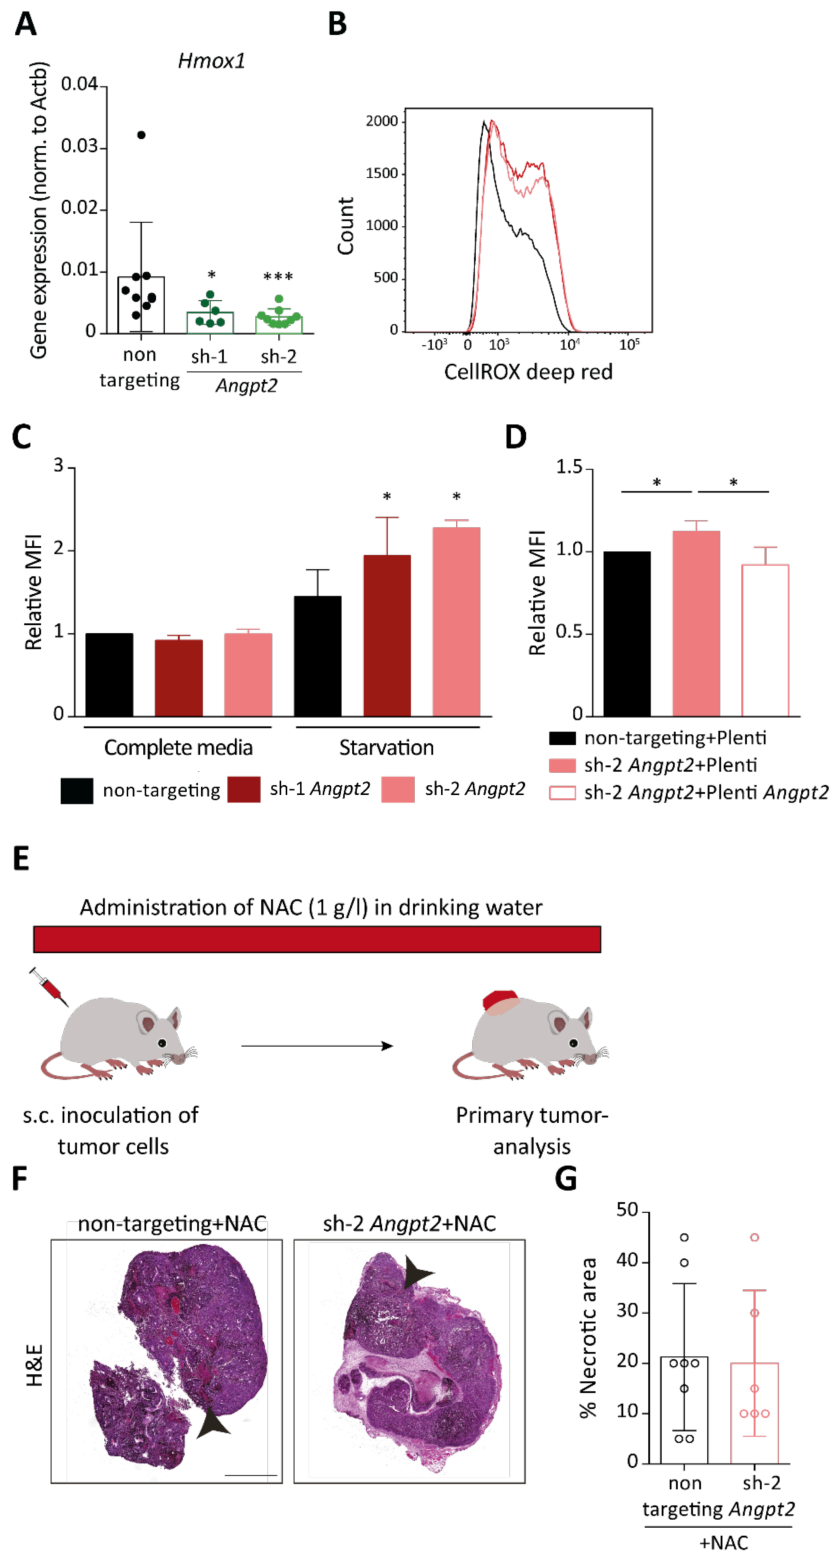

**Supplementary figure S6. *Angpt2* knockdown in tumor cells affects the cellular redox balance. (A)** *Hmox1* expression in control and *Angpt2* knockdown B16F10 primary tumors was quantified using qRT-PCR (n=6-9; mean  $\pm$  SD). \*, p<0.05, \*\*\*, p<0.001, Mann Whitney U test. **(B)** Representative histograms showing CellROX expression profile of control and *Angpt2*-depleted RET primary tumors. **(C)** Quantitation of ROS levels in control and *Angpt2*-depleted RET tumor cells under complete medium (10% FCS) and starvation (serum starved) conditions (n=4; mean  $\pm$  SD). \*p<0.05, two-tailed paired Student's t-test. **(D)** Quantitation of ROS levels in control+Plenti, sh-2+Plenti and sh-2+Plenti *Angpt2* RET tumor cells under starvation conditions (n=5; mean  $\pm$  SD). \*p<0.05, two-tailed paired Student's t-test. **(E)** Schematic representation of the rescue experiment to investigate the influence of ROS on intratumoral necrosis in *Angpt2*-depleted tumors. **(F)** Representative H&E images of control and *Angpt2* knockdown RET primary tumors treated with NAC are shown. Arrowheads indicate necrotic area. Scale bar: 2mm. **(G)** Quantitation of intratumoral necrotic area (n=6-8; mean  $\pm$  SD).

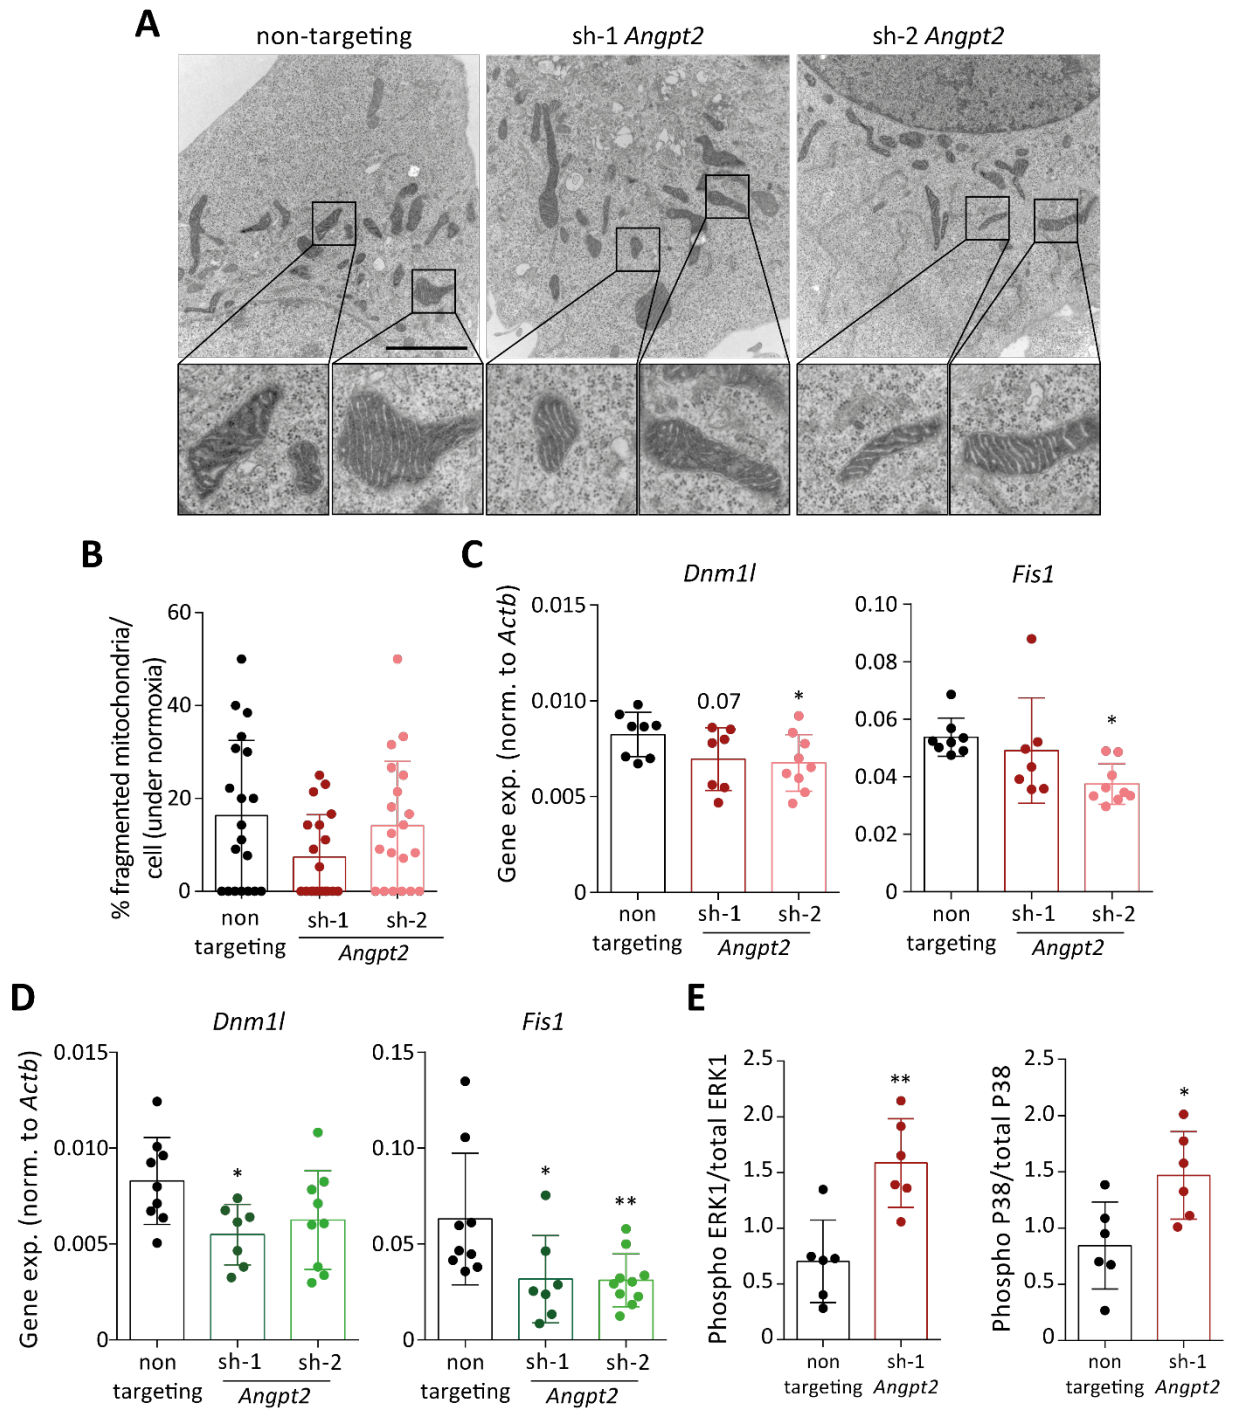

**Supplementary figure S7. Tumor cell-expressed *Angpt2* alters mitochondrial dynamics. (A)** Representative electron microscopic images of control and *Angpt2*-deficient RET tumor cells kept under normoxic conditions. Square boxes depict ROIs at higher magnification. Scale bar: 2 $\mu$ m. **(B)** Quantitation of fragmented mitochondria per cell (n=19-20 cells/condition; mean  $\pm$  SD). **(C)** *Dnm1l* and *Fis1* expression in control and *Angpt2* knockdown RET primary tumors was quantified using qRT-PCR (n=7-9; mean  $\pm$  SD). \*, p<0.05, Mann Whitney U test. **(D)** *Dnm1l* and *Fis1* expression in control and *Angpt2* knockdown B16F10 primary tumors was quantified using qRT-PCR (n=7-9; mean  $\pm$  SD). \*, p<0.05, \*\*, p<0.01, Mann Whitney U test. **(E)** Densitometry quantitation of protein intensities on Western Blot (Figure 4H) was performed with Fiji. Dot plots show ratio of phospho to total ERK1 and P38 proteins. (n=6; mean  $\pm$  SD). \*, p<0.05, \*\*, p<0.01, Mann Whitney U test.

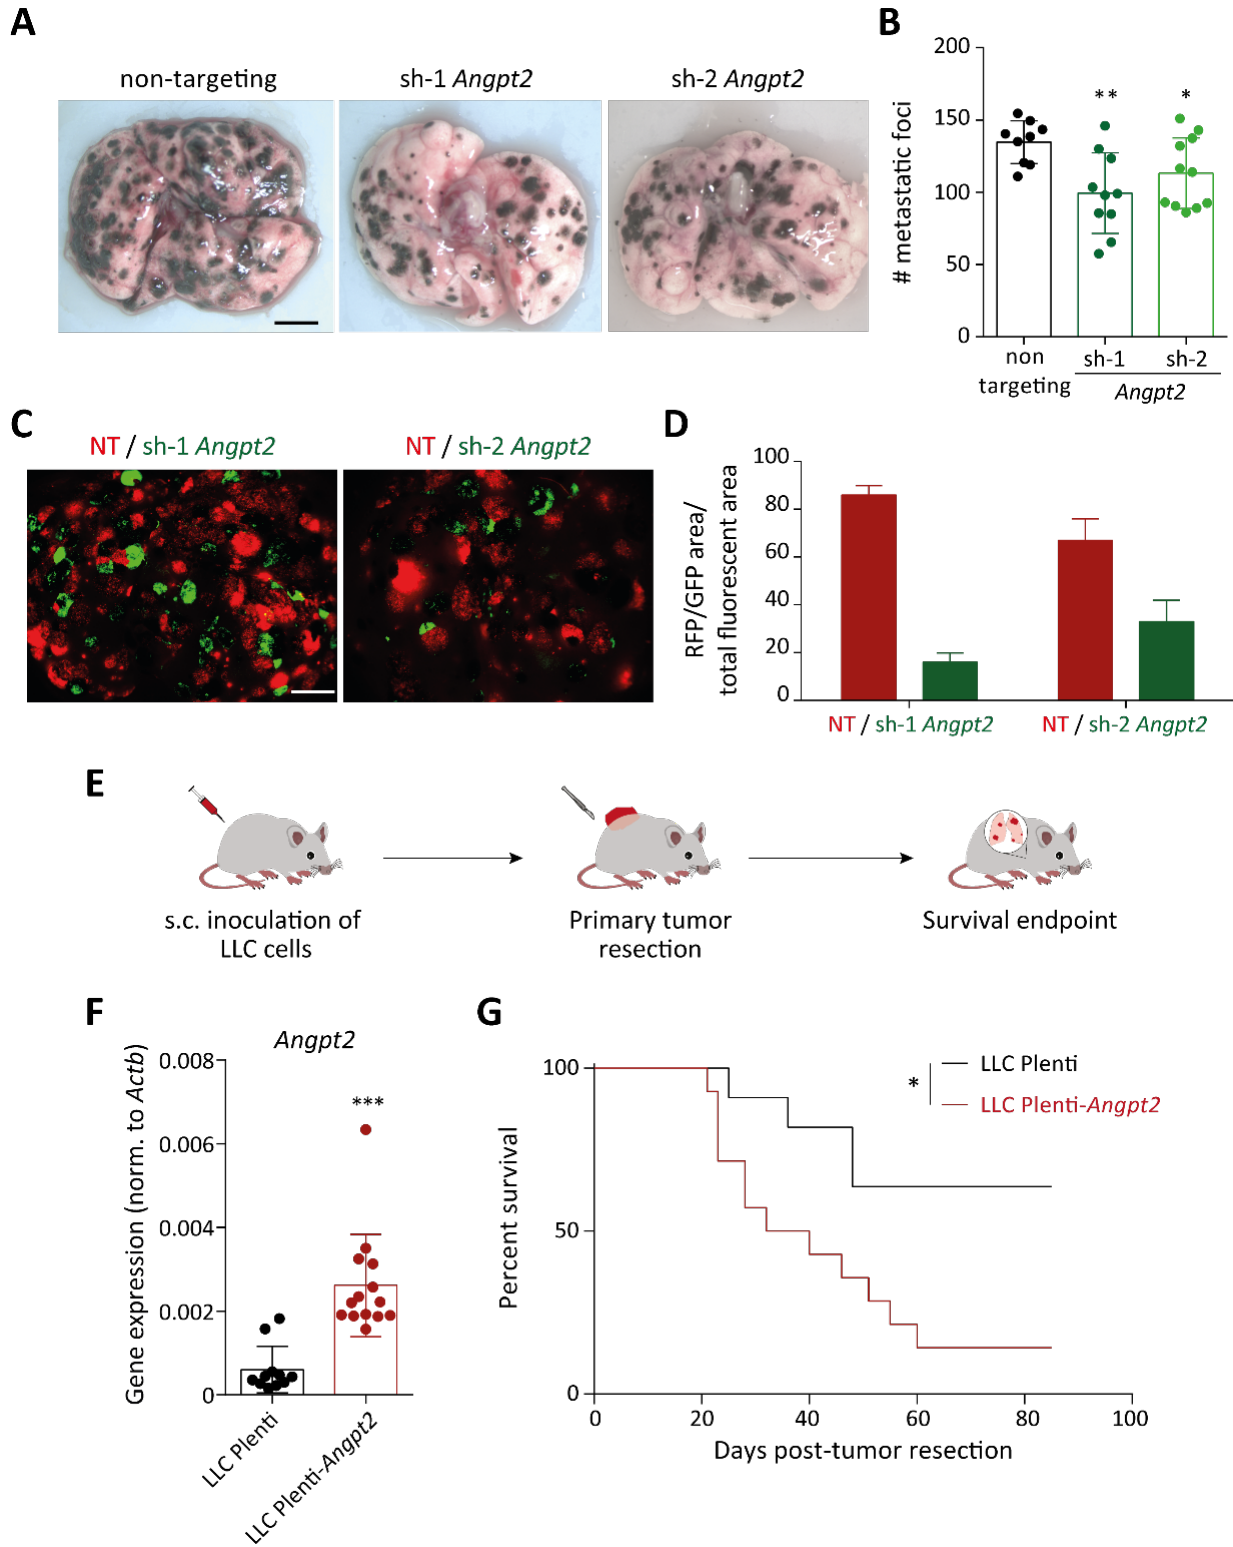

**Supplementary figure S8. Tumor cell-expressed *Angpt2* promotes metastasis.** **(A)** Control or *Angpt2*-silenced B16F10 cells were injected into the tail vein of C57BL/6N mice. The mice were sacrificed after 14 days. Shown are representative images of lung metastatic foci imaged under a stereomicroscope. Scale bar: 5mm. **(B)** The graph represents the quantitation of lung metastatic foci (n=9-11; mean  $\pm$  SD). \*, p<0.05, \*\*, p<0.01, Mann Whitney U test. **(C)** Control (in red) and *Angpt2*-silenced (in green) B16F10 tumor cells were co-injected intravenously in mice. Lungs were harvested 14 days after tumor cell inoculation and visualized under a fluorescent dissection microscope. Representative images of lung metastatic foci are shown. Scale bar: 2mm. **(D)** Quantitation of lung colonization by control (in red) or *Angpt2*-depleted (in green) B16F10 tumor cells. The area of each metastatic colony (RFP/GFP) was normalized to the combined fluorescent area (n=6; mean  $\pm$  SD). **(E)** Schematic representation of the LLC spontaneous metastasis experiment. **(F)** *Angpt2* expression in control and *Angpt2*-overexpressing LLC primary tumors was quantified using qRT-PCR (n=11-14; mean  $\pm$  SD). \*\*\*, p<0.001, Mann Whitney U test. **(G)** Kaplan-Meier plot showing percent survival of mice implanted with either control or *Angpt2*-overexpressing LLC tumor cells after primary tumor resection. \*, P<0.01, Log-rank (Mantel-Cox) test.

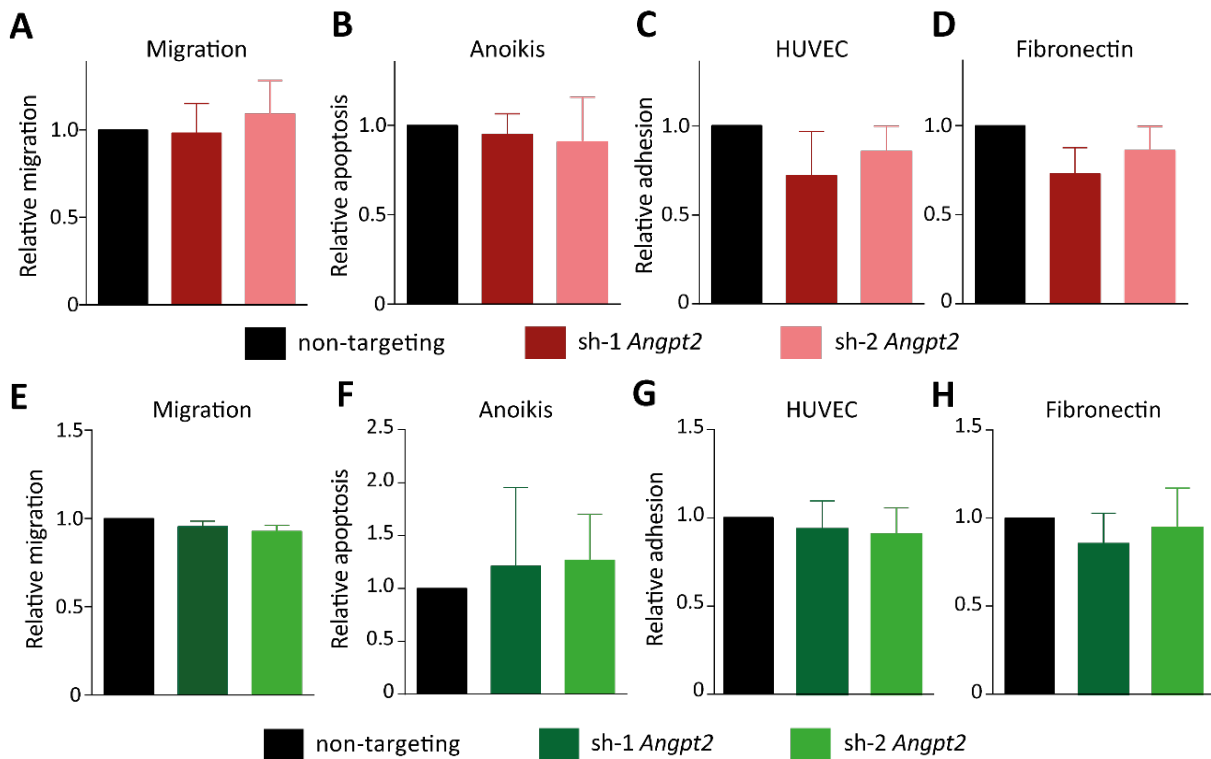

**Supplementary figure S9. Tumor cell-expressed *Angpt2* does not affect early stages of metastasis *in vitro* (A,E, migration; B,F, anoikis; C,G, adhesion to EC; D,H, adhesion to fibronectin) of RET tumor cells (A-D) and B16F10 cells (E-H).** (A) Control and *Angpt2*-deficient RET tumor cells were plated on Transwell (8  $\mu$ m pore size) of cell invasion and migration (CIM) plates and their migration toward serum containing medium was monitored for 48h by impedance-based RTCA measurements (n=3; mean  $\pm$  SD). (B) Control or *Angpt2*-silenced RET cells were grown on ultra-low attachment plates for 48h. Thereafter, cells were stained with Annexin V-APC and FxCycle to compute apoptotic cells by FACS (n=4; mean  $\pm$  SD). (C) Control and *Angpt2* knockdown RET tumor cells were allowed to adhere for 40min on a monolayer of HUVECs. Post-adhesion, non-adherent cells were removed and the fraction of adherent tumor cells was analyzed by FACS (n=4; mean  $\pm$  SD). (D) Control or *Angpt2*-silenced RET cells were plated on Fibronectin-coated plates for 40min. Non-adherent cells were washed away and adherent cells were quantified by spectrophotometric analysis of crystal violet stain (n=3; mean  $\pm$  SD). (E) Control or *Angpt2*-deficient B16F10 tumor cells were plated on Transwell (8  $\mu$ m pore size) of CIM plates and their migration toward serum containing medium was monitored for 48h by impedance-based RTCA measurements (n=3; mean  $\pm$  SD). (F) B16F10 cells were grown on ultra-low attachment plates for 48h. Thereafter, cells were stained with Annexin V-APC and FxCycle to compute apoptotic cells by FACS (n=4; mean  $\pm$  SD). (G) Control and *Angpt2* knockdown B16F10 cells were allowed to adhere for 40min on a monolayer of HUVECs. Post-adhesion, non-adherent cells were removed, and the fraction of adherent tumor cells was quantitated by FACS (n=3; mean  $\pm$  SD). (H) Control or *Angpt2*-silenced B16F10 cells were seeded on Fibronectin-coated plates for 40min. Non-adherent cells were washed away and adherent cells were quantified by spectrophotometric analysis of crystal violet stain (n=5; mean  $\pm$  SD). (A-H) The data were normalized to the non-targeting shRNA controls.

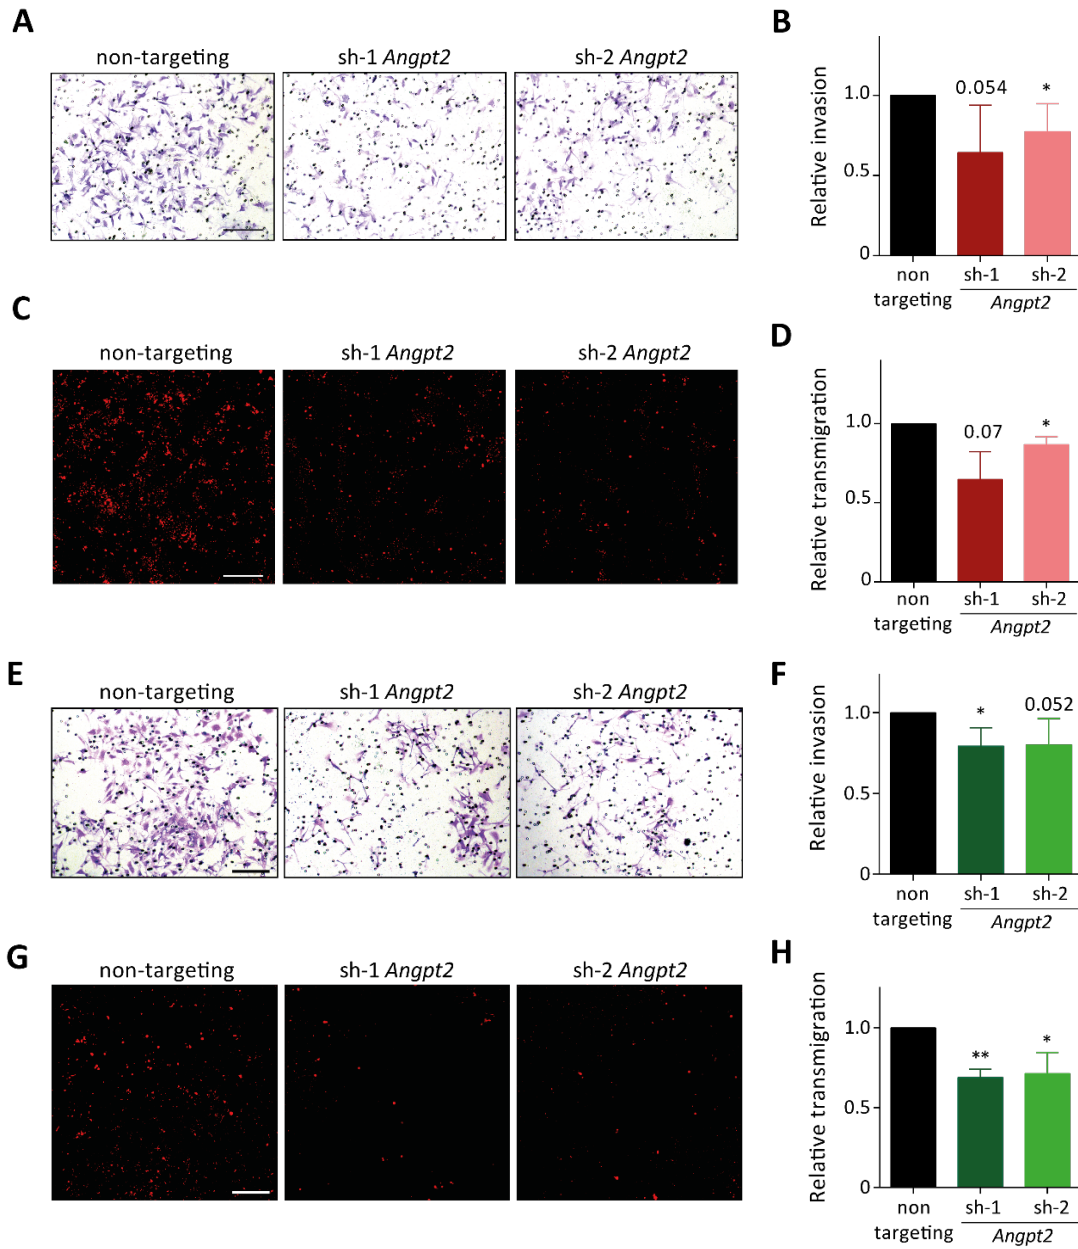



**Supplementary figure S10. Silencing of *Angpt2* impairs invasion through the basement membrane and transmigration across the endothelial barrier of RET tumor cells (A-D) and B16F10 cells (E-H).**

**(A)** Representative images of control or *Angpt2*-depleted RET invaded cells. Scale bar: 100  $\mu\text{m}$ .

**(B)** Quantitation of invasiveness in control and *Angpt-2* depleted RET cells (n=5; mean  $\pm$  SD). \*p<0.05, two-tailed paired Student's t-test.

**(C)** Representative images show PKH-26 Red-labeled parental (non-targeting) and *Angpt2*-depleted transmigrated RET tumor cells on the lower side of the Transwell. Scale bar: 100  $\mu\text{m}$ .

**(D)** Quantification of transmigrated parental and knockdown (sh-1 and sh-2 *Angpt2*) tumor cells (n=3; mean  $\pm$  SD). \*p<0.05, two-tailed paired Student's t-test.

**(E)** Representative images of control or *Angpt2*-depleted B16F10 invaded cells. Scale bar: 100  $\mu\text{m}$ .

**(F)** Quantitation of invasiveness in control and *Angpt-2* depleted B16F10 cells (n=5; mean  $\pm$  SD). \*p<0.05, two-tailed paired Student's t-test.

**(G)** Representative images show PKH-26 Red labeled parental (non-targeting) and *Angpt2*-depleted transmigrated B16F10 tumor cells on the lower side of the Transwell. Scale bar: 100  $\mu\text{m}$ .

**(H)** Quantification of transmigrated parental and knockdown (sh-1 and sh-2 *Angpt2*) tumor cells (n=4; mean  $\pm$  SD). \*p<0.05, \*\*, p<0.01, two-tailed paired Student's t-test.

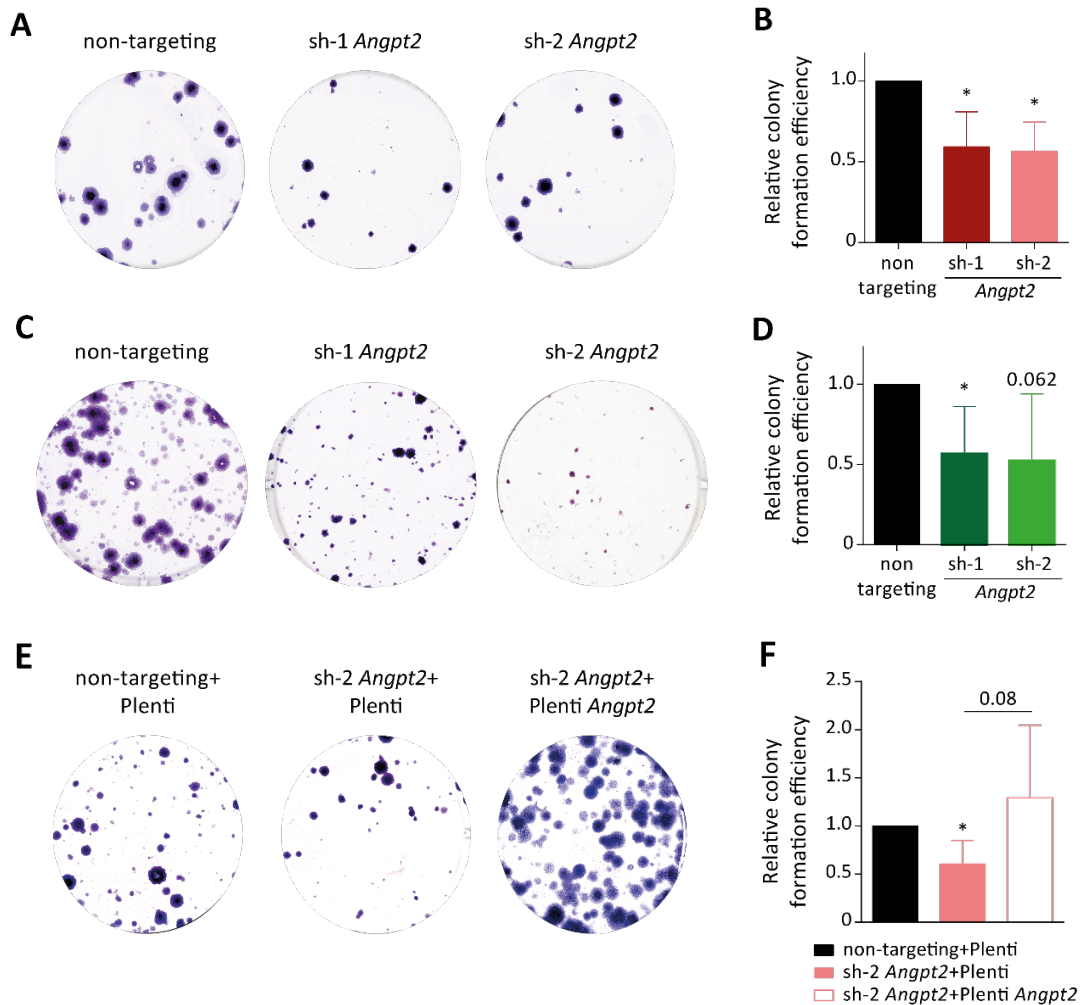

**Supplementary figure S11. Silencing of *Angpt2* reduces *in vitro* colony formation of RET tumor cells (A,B,E,F) and B16F10 cells (C,D).** (A) Control and *Angpt2*-silenced RET cells were cultured under anoikis conditions for 48h. Next, cells were harvested, and 600 cells were seeded in a 6-well plate for the colony formation assay. Shown are representative images from the colony formation assay. (B) The graph quantifies the number of colonies stained with crystal violet (n=4; mean  $\pm$  SD). \*p<0.05, two-tailed paired Student's t-test. (C) Control and *Angpt2*-silenced B16F10 cells were cultured under anoikis condition for 48h. Next, cells were harvested and 600 cells were seeded in a 6-well plate for the colony formation assay. Shown are representative images from the colony formation assay. (D) The graph quantifies the number of colonies as stained with crystal violet (n=5; mean  $\pm$  SD). \*p<0.05, two-tailed paired Student's t-test. (E) Representative images from the colony formation assay of control+Plenti, sh-2+Plenti and sh-2+Plenti *Angpt2* RET tumor cells. (F) The graph quantifies the number of colonies stained with crystal violet (n=5; mean  $\pm$  SD). \*p<0.05, two-tailed paired Student's t-test. (A-F) The data were normalized to the non-targeting shRNA controls.
